# Supplementary material
Source: PubMed Central journal article supplement (PMC5291027)
Supplement: supp_pp.16.01320_PP2016-01320R1_Supplemental_Data.pdf [file supp_pp.16.01320_PP2016-01320R1_Supplemental_Data.pdf]

**Supplemental Data**

**Supplemental Tables S1 ~ S2**

**Supplemental Figures S1 ~ S4**

**Supplemental Table S1.** Oligonucleotides used in this study

| Name             | Forward sequence                                      | Reverse sequence                            | Usage        |
|------------------|-------------------------------------------------------|---------------------------------------------|--------------|
| <i>FLC</i>       | GCCAAGAAGACCGAACTCATGTTGA                             | CAACCGCCGATTTAAGGTGGCTA                     | qRT-PCR      |
| <i>VIN3</i>      | AGAAGCTGTGTTCTCAGGCAATGG                              | TCTTCGTCCTTCGACTTTCGACAAA                   | qRT-PCR      |
| <i>VIL1</i>      | TGAAGTTGGACCTCTTGATGGACCT                             | CTGCACGCAGCTGGAACATAATCTC                   | qRT-PCR      |
| <i>FT</i>        | GGAACAACCTTTGGCAATGAGAT                               | CTGCCAAGCTGTGCGAAACAA                       | qRT-PCR      |
| <i>SOCI</i>      | TGGGAGAAGGCATAGGAACATGC                               | CGCTTTCATGAGATCCCCACTTTTC                   | qRT-PCR      |
| <i>PP2A</i>      | TATCGGATGACGATTCTTCGTGCAG                             | GCTTGGTCGACTATCGGAATGAGAG                   | qRT-PCR      |
| <b>FLC-P1</b>    | TGTAGGCACGACTTTGGTAACAC                               | TTTTCACTTTCGTTGCTAAAATGAAAA<br>CTATCTTTC    | ChIP-qPCR    |
| <b>FLC-P2</b>    | CTTAGTATCTCCGGCGACTTGAACC                             | GCGTCACAGAGAACAGAAAGCTGA                    | ChIP-qPCR    |
| <b>FLC-P3</b>    | TACAACCCTCCAATATAATAACCAAATGG<br>TTG                  | CACGTTCTAAAAGGCTTCTTCTTAT<br>TAAATC         | ChIP-qPCR    |
| <b>FLC-P4</b>    | GTGAATAGTGATTTTGACCTATGATTATC<br>GTACAG               | GGTGGCTAATTAAGTAGTGGGAGAG<br>TCAC           | ChIP-qPCR    |
| <b>PP2A_ChIP</b> | AGCCTTTATACCCGATTGCTGTGCTTATCG                        | CCTCTCCTCTCCAAGAGCACGAGC                    | ChIP-qPCR    |
| <b>AG_ChIP</b>   | GTGAAACAAATTTTCTGCAGAATGTCAC<br>T                     | AGTTTTTGAGGCACTAAAATCTTTGG<br>GTAAATC       | ChIP-qPCR    |
| <b>VIN3 PHD</b>  | <u>CACCT</u> GTGAGAATTTAGCTTGTAGAGCTG<br>CGCT         | CAGAGCTTCCATTGCCTGAGAACAC<br>AGCT           | Rec. protein |
| <b>VIL1 PHD</b>  | <u>CACCT</u> GCAAGAATGCATCGTGTAGAGCTA<br>ATGT         | TGCCTTTTTAATTGCAGAAGTGCAAA<br>GCT           | Rec. protein |
| <b>VIN3 CDS</b>  | <u>CACCAT</u> GCAAGCTGCTTCGCTCTCAAAGA<br>TC           | ATGCCAAAGCTTGAGGCAGATCCC                    | Construct    |
| <b>VIL1 CDS</b>  | <u>CACCAT</u> GGATTCATCATCGACGAAATCGA<br>AGATCTCAC    | ATGTGAGGTCATTACTCCATTGTTTG<br>GCCTTTTG      | Construct    |
| <b>VIN3_SW</b>   | TggTGTCATTTGGAATGTGGTTTGAAGC                          | ATGACAccACGATCCACAAGCATCAC<br>AAGT          | Construct    |
| <b>VIL1_SW</b>   | TGGTGTACATTGAGTGTGCTTTTCGAGA<br>AGTC                  | CACTCAATGTGACACCATAAGCCAC<br>AGAACTC        | Construct    |
| <b>COLDAIR</b>   | <u>CACC</u> CTTTGTCTCTATTCGTTAAAATTGAC<br>AATCCACAACC | AACATATACGAGAAAACTTTTCGGA<br>TTTTTCAATGAACC | Construct    |

**Supplemental Table S2.** Biotinylated histone peptides used in this study.

| Histone peptide, Biotin conjugate | Cat. No. | Company   |
|-----------------------------------|----------|-----------|
| H3 (1-21)                         | 12-403   | MILLIPORE |
| H3K4me1                           | 12-563   | MILLIPORE |
| H3K4me2                           | 12-430   | MILLIPORE |
| H3K4me3                           | 12-564   | MILLIPORE |
| H3K9me1                           | 12-569   | MILLIPORE |
| H3K9me2                           | 12-430   | MILLIPORE |
| H3K9me3                           | 12-568   | MILLIPORE |

**A**

```

VIN3 150 SCCICQKFD■DNKDP■SLWLTCD-----DACG--SSCHLECGLKQDRYG---IGSD-DLDG-RFYCAYC
VIL1  69 SCCVCHNF■DENKDP■SLWLVCEPEKSD■DFEFCG--LSCHIECAFREVKVGVI■ALGNLMKLDG-CFCCYSC
VIL2 166 SCCICRKY■DDNKDP■SLWLTCS■SDPPFEGESCG--FSCHLECAFNTEKSG---LGKDKQSEGGCCFY■CVSC
VIL3 122 SCCICFKY■DDNKDP■SLWLT■CNSDSQFDGESCG--LSCHLNCAFDSEKSGLKEDTPSSDIDGC-FNCVSC

```

**B**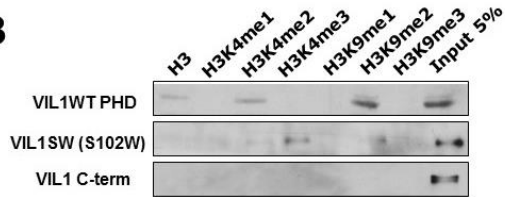**C**

```

AtVIN3 SCCICQKFD▼DNKDP▼SLWLTCD-----ACGSS*SCHLECGLKQDRYGIGSD-----DLDG
AtVIL1 SCCVCHNF▼DENKDP▼SLWLVCEPEKSD▼DFEFCGLSCHIECAFREVKVGVI▼ALGNLMKLDG
AtVIL2 SCCICRKY▼DDNKDP▼SLWLTCS▼SDPPFEGESCGFSCHLECAFNTEKSGLKDK-QSE--GC
AtVIL3 SCCICFKY▼DDNKDP▼SLWLT▼CNSDSQFDGESCGLSCHLNCAFDSEKSGLKEDT-PSSDIDG
OsVIN3 SCCICHQ▼FDNKDP▼SLWLVCASEN-DDKNCCGSSCHIECALQHKRVGCFNLG-NIIQLDG
BoVIN3 SCCVCQNF▼DENKDP▼SLWLTACE-----GCGLSCHLECALKEDGYGIGYN-----DG
AaVIN3 SCCICHNF▼DDNKDP▼SLWLTCE-----ACGLSCHLECGLKEDKYRIGCDNDDDESGLDG
SlVIN3 SCCICHQY▼DDNKDP▼SLWLTCDSDSQDET▼KPCGLSCHLKALEHEQSGILKNC-INPKLDG
BnVIN3 SCCICHKY▼DDNKDP▼SLWLT▼CGSDPPFEGESCGLSCHLDCAFKTEKSGLK----PSSDVDG
***:* :*:*****:.* ** ***:.*.:
AtVIN3 RFYCAYC
AtVIL1 CFCCYSC
AtVIL2 CFYCVSC
AtVIL3 CFNCVSC
OsVIN3 SYSCASC
BoVIN3 SFHCVFC
AaVIN3 MFYCAFC
SlVIN3 DFYCVSC
BnVIN3 CFSCVSC
: * *

```

**Supplemental Figure S1. PHD-finger domains of VIN3 family proteins. (A)** Multiple alignments of PHD-finger domains of VIN3 family proteins in Arabidopsis. Two aromatic ring residues (F and W, indicated by black boxes) and a polar charged Serine residue (S, indicated by \*) are conserved in VIN3 family proteins. **(B)** *In vitro* histone peptide binding assays using His-tagged recombinant wild-type VIL1 (VILWT) and modified VIN3 (VIL1SW) proteins. **(C)** Multiple alignments of PHD finger domain VIN3 family proteins in Arabidopsis and other plant species. Two hydrophobic aromatic ring residues (F/Y and W, indicated by downward arrowheads) and a polar charged Serine residue (S, indicated by asterisk) are conserved in all VIN3 family of proteins in plant species. BnVIN3 (*Brassica napus* VIN3, NCBI protein number: XP\_013727218), OsVIN3 (*Oryza Sativa* VIN3, NCBI protein number: XP\_015639862), BoVIN3 (*Brassica Oleracea* VIN3, NCBI protein number: XP\_013629072), AaVIN3 (*Arabis alpina* VIN3, NCBI protein number: AGU09528), SlVIN3 (*Solanum Lycopersicum* VIN3, NCBI protein number: XP\_004238003)

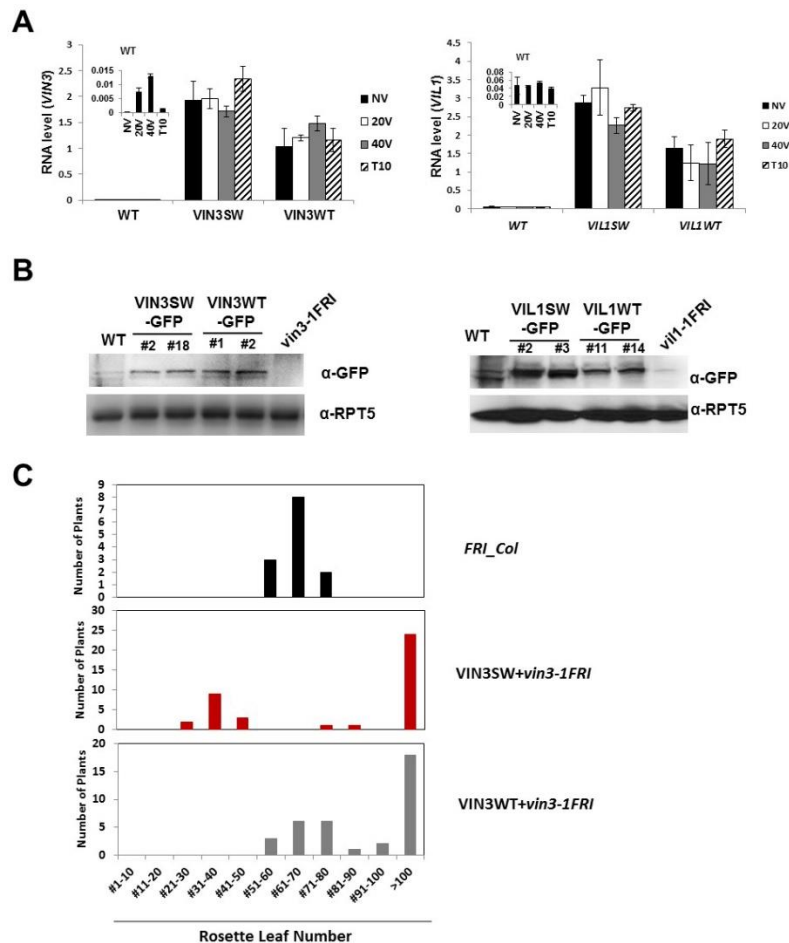

**Supplemental Figure S2. Characterization of VIN3SW, VIN3WT, VIL1SW, and VIL1WT transgenic lines. (A)** The mRNA levels of *VIN3* and *VIL1* were determined by real-time RT-PCR during vernalization. Insets show mRNA levels of *VIN3* and *VIL1* in the wild-type *FRI\_Col* plants during vernalization. *PP2A* (at1g13320) was used as a control for qRT-PCR analyses. Data (relative levels; mean  $\pm$  SD of quantitative RT-PCR;  $n = 3$ ) **(B)** Detection of VIN3-GFP and VIL1-GFP protein from each two representative transgenic lines. Non-vernalized; NV, 20 days of vernalization; 20V, 40 days of vernalization; 40V, and 40 days of vernalization followed by 10 days of normal growth temperature; T10. WT; *FRI\_Col*, VIN3SW; VIN3SW in *vin3-1FRI* plants, VIN3WT; VIN3WT in *vin3-1FRI* plants. **(C)** Flowering times of T1 primary transgenic plants of VIN3SW in *vin3-1FRI* ( $n=40$ ) and VIN3WT in *vin3-1FRI* ( $n= 36$ ) compared to the wild-type (*FRI\_Col*).

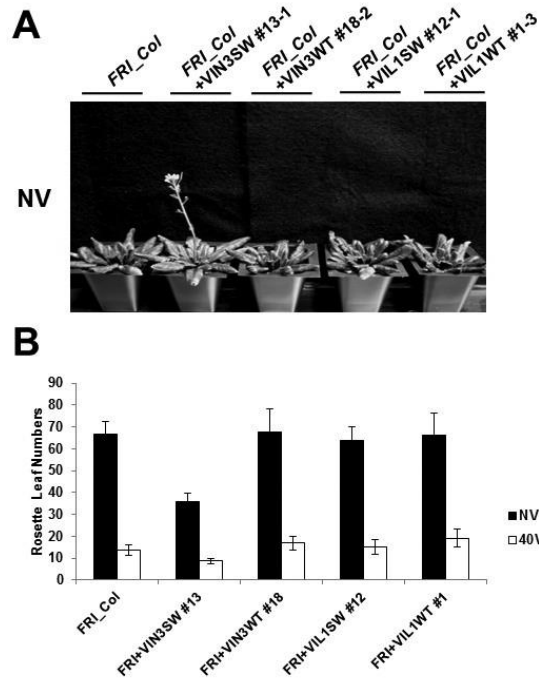

**Supplemental Figure S3. The introduction of VIN3SW transgene into *FRI\_Col* wild-type plants also triggers accelerated flowering. (A)** Early flowering of homozygous VIN3SW transgenic lines in *FRI\_Col* background at NV condition. **(B)** Measurement of rosette leaf numbers of each transgenic plants in *FRI\_Col* background at both NV and 40V condition (non-vernalized; NV and 40 days vernalized; 40V;  $n=12$ ). Plants were grown under long-day condition (16 hours light and 8 hours dark) after vernalization treatment.

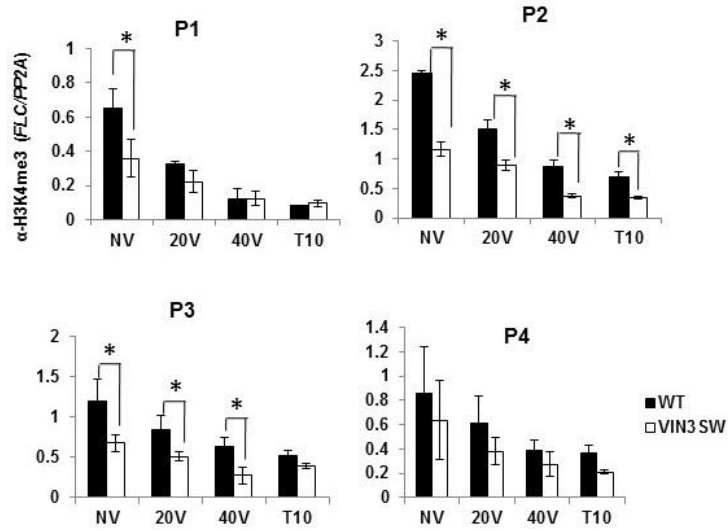

**Supplemental Figure S4. Changes in H3K4me3 at *FLC* chromatin during vernalization.** A schematic representation of genomic structure of *FLC* and relative positions of the primers used in ChIP assays are shown (P1 ~ P4) is shown in Figure 4A. Data (mean  $\pm$  SD of quantitative PCR;  $n=3$ ). Statistically significant changes are indicated by asterisks (Student's t-test,  $P < 0.01$ ). Non-vernalized; NV, 20 days of vernalization; 20V, 40 days of vernalization; 40V, and 40 days of vernalization followed by 10 days of normal growth temperature; 40VT10. WT; *FRI*\_Col, VIN3SW; VIN3SW in *vin3-1FRI* plants.
